# Supplementary material for: Recording behaviour of indoor-housed farm animals automatically using machine vision technology: A systematic review
Source: PLOS journal article supplement (doi:10.1371/journal.pone.0226669), 2019-12-23
Supplement: S1 (10.1371/journal.pone.0226669.s001) [file journal.pone.0226669.s001]

| Information            | Type of input  | Description                                                                                                                                                                                          |
|------------------------|----------------|------------------------------------------------------------------------------------------------------------------------------------------------------------------------------------------------------|
| Author Year Title      | Text           | Basic information about the paper                                                                                                                                                                    |
| Objective of the study | Text           | Aim(s) mentioned in the paper                                                                                                                                                                        |
| <b>Methods</b>         |                |                                                                                                                                                                                                      |
| Species                | Drop-down list | Animal species                                                                                                                                                                                       |
| Breed                  | Text           | Breed, if mentioned                                                                                                                                                                                  |
| Age of animals         | Number         | Age in days/weeks/months                                                                                                                                                                             |
| Housing type           | Drop-down list | Description of housing type, Indoor, test pen, commercial                                                                                                                                            |
| Floor colour / type    | Drop-down list | Floor characteristics including material and colour                                                                                                                                                  |
| Lighting               | Text           | Type and strength of light source                                                                                                                                                                    |
| Group size tested on   | Number         | Number of animals per pen                                                                                                                                                                            |
| Total sample size      | Number         | Total sample size analysed                                                                                                                                                                           |
| Device type            | Drop-down list | Choice of: colour camera; 3-d; infrared; colour, infrared and 3D; RFID detectors under floor grid and 3D; black and white camera; Thermal camera (exclude); Black and white camera and colour camera |
| Camera model           | Text           | Camera specs                                                                                                                                                                                         |
| Lens model             | Text           | Type of lens, if mentioned                                                                                                                                                                           |
| Camera location        | Drop-down list | Choice of: ceiling, angled view; Ceiling, top down; Wall; Tri-pod; top down and side view; unknown; Top down; Side view                                                                              |
| Track within group     | Yes / no       | Whether the method is able to track an individual within a group of animals                                                                                                                          |
| Track unmarked         | Yes / no       | Whether the method is able to track an unmarked individual                                                                                                                                           |
| Behaviour studied      | Drop-down list | Type of behaviour studied                                                                                                                                                                            |
| Algorithm used         | Yes/no         | Whether an algorithm is being applied                                                                                                                                                                |
| Data processing        | Text           | Description of the data processing method                                                                                                                                                            |
| <b>Results</b>         |                |                                                                                                                                                                                                      |
| Accuracy               | Number         |                                                                                                                                                                                                      |
| Precision              | Number         |                                                                                                                                                                                                      |
| Specificity            | Number         |                                                                                                                                                                                                      |
| Sensitivity            | Number         |                                                                                                                                                                                                      |
| Reliability            | Number         |                                                                                                                                                                                                      |

|                      |                |                                                            |
|----------------------|----------------|------------------------------------------------------------|
| Generated from study | Drop-down list | The type of data or outcome that is generated              |
| End result           | Drop-down list | Type of end product, for example an algorithm or dataset   |
| Ready to use         | Drop-down list | Whether the method is ready to be used by others           |
| Access to data       | Drop-down list | Statement about data / algorithm availability if mentioned |
