# Supplementary material for: Recording behaviour of indoor-housed farm animals automatically using machine vision technology: A systematic review
Source: PLoS One. 2019 Dec 23;14(12):e0226669. doi: 10.1371/journal.pone.0226669 (PMC6927615; doi:10.1371/journal.pone.0226669)
Supplement: S2 Table — (XLSX) [file pone.0226669.s002.xlsx]

## Sheet: Sheet1
Author	Year	Title	Device type	Specific camera make/model	Lens	Camera location	Algorithm?	Data processing	Track individual within group?	Track unmarked individual?	Track behaviors?	Generated	Total sample size	Group size tested on	Housing	Floor colour	Lighting	Species	Breed	Age	Validation	Accuracy	Precision	Specificity	Sensitivity	Reliability	End result	Ready to use	Access to data
Aydin, A.	NA	A fully automated monitoring tool to detect lameness of broiler chickens by image analysis	color camera	Guppy F036C	C30811KP 8,5mm lens (Pentax)	Ceiling, top down	yes	segmentation, shape, fit eliptical shape, optimal shape labelled as posture parameters	no	no	yes	posture	250	1	indoor	not mentioned	Not mentioned	broilers	Ross 308	39 days	against gold-standard	0.83	NA			NA	data	no	no
Nasirahmadi, A.	2017	A new approach for categorizing pig lying behaviour based on a Delaunay triangulation method.	black and white camera	Sony RF2938	Board lens 3.6 mm, 90°	Ceiling, top down	yes	background subtraction, direct least squares ellipse fitting method, Delaunay triangulation for clustering, Multilayer perceptron neural network to classify pigs into thermal categories	no	no	no	location	88	22	commercial	grey	white fluorescent tube lights	fattener	Not listed	30kg	against treatment	around 95%				NA	algorithm	no	unclear
Nasirahmadi, A.	2017	Using automated image analysis in pig behavioural research: Assessment of the influence of enrichment substrate provision on lying behaviour	black and white camera	Sony RF2938, EXview HAD CCD	Board lens 3.6 mm, 90°	Ceiling, top down	yes	background subtraction, Otsu's method for greyscale to binary, small objects removed with morphological closing operator. Ellipse fitting, then centre calculated and x,y position of this used for lying position.	no	no	no	location	102 - 120	17-20	commercial	grey	white fluorescent tube lights	fattener	Landrace x Large White	30kg	against gold-standard	93-95%	NA			NA	algorithm	no	unclear
Nilsson, M.	2015	Development of automatic surveillance of animal behaviour and welfare using image analysis and machine learned segmentation technique	color camera	Axis M3006	NA	Ceiling, top down	yes	learning based segmentation, based on 12 channels of features- 10 are colour filters and colour gradient magnitude, a 'Soft Otsu' channel and a max-min filter. Manually defined regions of interest (dunging and lying areas).	no	no	no	location	9	9	commercial	partially slatted, straw bedded	fluorescent lamp	fattener	Not listed	?	against gold-standard	73.2	two 10 min sessions!				algorithm	no	no
D'Eath, R.B.	2018	Automatic early warning of tail biting in pigs: 3D cameras can detect lowered tail posture before an outbreak	3-d	IFM O3D301	NA	Ceiling, top down	yes	information not available- "proprietary algorithm" provided by commercial partner	no	no	yes	tail posture	667	30	indoor	slatted	Not relevant- 3D camera used own light source	fattener	JSR Genetics Large White x Landrace x Hampshire	35-87 days	both gold standard and animal-based measures	0.739					algorithm	yes	open
Zhuang	2018	Development of an early warning algorithm to detect sick broilers	color camera	Logitech C922	?	Side view	yes	Poultry segmentation -> feature extraction -> eigen vectors established according to: concavity, skeleton attitude angle, shape features, area-linear rate, elongation, cirularity -> analyze whether the poultry is in a pecking state -> health status evaluated by the support vector machine	no	no	no	posture	20	1	test pen	wood shavings	?	chickens	broiler chickens (yellow feather and white feather)	4-6 weeks	against treatment	99.469% (SVM model with POLY kernel function)	NA	NA	NA	NA	algorithm	prototype	no
Zheng, C.	2018	Automatic recognition of lactating sow postures from depth images by deep learning detector.	3-d	Microsoft Kinect	NA	Ceiling, top down	yes	Obtain depth videos, extract and pre-process, faster R-CNN object detector, obtain classification, class score, locatation, temporality, then sow posture statistical analysis	no	no	no	posture	?	1	indoor	concrete	heat lamp	sow	Small-ears Spotted pig of Guangdong	?	against gold-standard	0.9358	0.991(Stand),0.776(Sit),0.763(Sternal recumbency),0.972(Ventral recumbency),0.987(Lateral recumbency)	NA	NA	NA	algorithm	prototype	no
Hansen, M.F.	2018	Automated monitoring of dairy cow body condition, mobility and weight using a single 3D video capture device	3-d	3D Kinect-like depth camera	NA	Ceiling, top down	no	manual labelling; Segment the cow: background removing by template; template matching for front, rear or both views; curverdness data; rolling ball algorithm; determination of spine;	yes	yes	no	movement, posture, weight	200	119 / 16 for repeatability	commercial	partially slatted, concrete	Mot mentioned	dairy cattle	Holstein-Friesian cows	NA	against gold-standard	5% error for weight and 83% classification lameness	NA			±0.25 Body Score	algorithm	no	no
Huang, W.	2018	Identification of group-housed pigsbased on Gabor and local binary pattern features	color camera	FL3-U3-88S2C-C	NA	Ceiling, top down	yes	Texture extraction: convolve imagewith 2D Gabor filters, PCA to reduce dimensions, encode image using LBP, use PCA to reduce dimensions; training and recognition for classification: labelling of images for training, SVM with linear kernel	yes	yes	no	individual identification	7	140 images from 7 pigs	test pen	NA	NA	fattener	NA	NA	against gold-standard	0.9186	NA	NA	NA	NA	in progress	no	no
Baek, H.	2017	Segmentation of Group-Housed Pigs using Concave Points and Edge Information	color camera	NA	NA	Ceiling, top down	yes	Gaussian Mixture Model (GMM) [12,13] to segment between background and foreground in the image for extracting the region of moving pigs	no	no	no	segmentation of individuals	20	20	commercial	not mentioned	Not mentioned	pig - general	Not listed	Not listed	against gold-standard	0.9367	NA			NA	algorithm	no	no
Chen, C.	2017	Image motion feature extraction for recognition of aggressive behaviors among group-housed pigs	color camera	Canadian point grey industrial camera FL3-U3-88S2C-C	Kowa LM6NCL 6.0 mm lens	Ceiling, top down	yes	Key frame sequence extraction, feature extraction (acceleration), feature classification and threshold setting (positive acceleration), aggressive behaivor recognition	no	no	yes	aggression	70	7	indoor	partially slatted, concrete	?	piglets	Not listed	24 kg	against gold-standard	95.82% (med aggression), 97.04 (high aggression)		96.95% (med aggression), 97.38% (high aggression) specificity	90.57% (med aggression), 92.54% (high aggression) sensitivity	NA	algorithm	prototype	no
Kim, J.	2017	Depth-Based Detection of Standing-Pigs in Moving Noise Environments	3-d	Kinect camera (Version 2, Microsoft, USA)	?	Ceiling, top down	yes	Clean up of 'noise' from other moving objects- dust, grit etc. Pig depth subtracted from background, Edge and outline detection combined to identify standing pigs.	no	no	no	standing	13	13	indoor	green slats	off- indoors at night	weaner	?	25+ days	both gold standard an existing technology	94.47					algorithm	no	unclear
Damasceno, F.A.	2017	Damasceno, F. A., Soares, C. M., Oliveira, C. E., Oliveira, J. L., & Oliveira, M. C. (2017). Evaluation of behavior in piglets using digital image processing. In 2017 ASABE Annual International Meeting (p. 1). American Society of Agricultural and Biological Engineers.	infrared	four micro cameras with infrared (Intelbras® 1000 lines of resolution, 1/3” CCD sensor and 512 x 492 pixels resolution	3.6 mm CCD lens	Top down	yes	Segmentation and thresholding techniques (binarization) were used for the processing of the images, which convert images from grayscale to binary images. Thus, the following images were subtracted from the background image and binarized.	no	no	no	location	4 pens? of 8-12?	2019-08-12	commercial	concrete	dim LED	piglets	?	0-21 days	against treatment	NA					algorithm	no	unclear
Fernandez-Carrion	2017	Fernández-Carrión, E., Martínez-Avilés, M., Ivorra, B., Martínez-López, B., Ramos, Á. M., & Sánchez-Vizcaíno, J. M. (2017). Motion-based video monitoring for early detection of livestock diseases: The case of African swine fever. PloS one, 12(9), e0183793.	color camera	?	?	Ceiling, angled view	yes	Optical flow for motion, motion smoothing to take out 'camera shake' effect, support vector machine for 3 types of movement- none, pigs, humans	no	no	no	movement	8	8	test pen	green slats	artificial 14H, off 10H	fattener	?	40kg	against treatment	NA					algorithm	prototype	open
Kim, J.	2017	Lying-Pig Detection using Depth Information	3-d	Kinect	?	Ceiling, top down	yes	Input: Depth data. Task 1: Spatiotemporal interpolation. Task 2: Background subtraction. Task 3: Morphology. Task 4: Connected component analysis. Output: Lying and standing pigs	no	no	no	standing	13	13	indoor	green slats	?	weaner	?	?	against gold-standard	0.8	NA	NA	NA	NA	algorithm	prototype	no
Martinez-Aviles	2017	Early Detection of Infection in Pigs through an Online Monitoring System	color camera	?	?	Ceiling, angled view	no	Webcam Zone Trigger software	no	no	no	movement	10	6 and 4	test pen	green slats	?	pig - general	Landrace 9 Large White	3.5 months	against treatment	NA	NA	0.8854	0.9687	NA	data	prototype	no
Aydin, A.	2017	Using 3D vision camera system to automatically assess the level of inactivity in broiler chickens	3-d	Microsoft Kinect	NA	Ceiling, top down	yes	Chicken locomotion behaviours -> 3d recording -> erase undesired objects -> calculate bird's contour -> remove bird's head -> fitting ellipses -> read depth info -> depth threshold -> classify lying or standing -> validation	no	no	no	gait	250	1	test pen	not mentioned	?	broilers	Ross 308	35 days	against gold-standard	93% (number of lying events)	NA	NA	NA	NA	algorithm	prototype	no
Buayai, P.	2017	Boundary Detection of Pigs in Pens based on Adaptive Thresholding using an Integral Image and Adaptive Partitioning.	color camera	KPTECH HDA-270	?	Top down	yes	Convert single frame image to gray scale -> histogram equalization and adaptive thresholding using the integral image -> morphological processing -> adaptive partitioning with polygon sub-block shape -> secondary segmentation of each sub-block with maximum entropy threshold segmentation and merging the result from each sub-block -> morphological processing -> adaptive partitioning with polygon su…	no	no	no	segmentation of individuals	23	12 and 11? (23 pigs in 2 pens)	commercial	not mentioned	"Insufficient and varied"	pig - general	? (Photos look like yorkshire or large white)	?	against gold-standard	0.5957	NA	NA	NA	NA	algorithm	prototype	no
Ahn, S.	2017	Cow Behavior Recognition Using Motion History Image Feature	color camera	NA	fisheye lens with distortion correction	Ceiling, top down	yes	Image sequence - pre-processing, MHI, Candidate MHI patch detection, feature extraction, classification	unclear	unclear	yes	other behav	"several"	Not listed	indoor	not mentioned	Not mentioned	dairy cattle	Not listed	Not listed	against gold-standard	60.83% to 82.83% based on differing observation times	NA			NA	in progress	no	no
Matthews, S.G.	2017	Automated tracking to measure behavioural changes in pigs for health and welfare monitoring	3-d	Microsoft Kinect for Xbox One		Ceiling, top down	yes	point cloud, filtering out pen & floor to only pigs, data reduction to voxels, outlier removal, surface normals, region growing, Hungarian algorithm tracking, standing/lying from depth GLMM, feeding and drinking from location in pen	yes	yes	yes	movement, resource use and basic behaviours	76	19	indoor	slatted	Not relevant- 3D camera used own light source	fattener	Landrace/Large White × synthetic sire line, Hermitage Seaborough	63 days	against gold-standard	0.89				Could track for 22 seconds	algorithm	no	no
Ju, M.	2017	Touching-pigs segmentation using concave points in continuous video frames	color camera	NA - 4m above	NA	Ceiling, top down	yes	RGB to HSV, gaussian mixture model to detect moving pigs, select cases of touching pigs, convex hull algorithm to detect concave points, build time-series data from concave points of consecutive frames, dynamic time wraping to align time series, and detection of extra information as holes in the touching region or the center of pigs using the skeleton location through median axis transform	yes	yes	no	segmentation of individuals	22	22	test pen	NA	NA	weaner	NA	NA	against gold-standard	92.95% holes; 96.15% no holes	NA	NA	NA	NA	algorithm	no	no
Ju, M.	2017	Segmnentation methods for a grouped-housed monitoring system		NA - 4m above	NA	Ceiling, top down	yes	hybryd method for segmentation of touching pigs, outline-based segmentation using points of contact and region-based segmentation usign a separation of regions by partitioning	yes	yes	no	segmentation of individuals	22	22	test pen	NA	NA	weaner	NA	NA	against gold-standard	0.9314	NA	NA	NA	NA	algorithm	no	no
Zhu W	2017	Recognition and drinking behaviour analysis of individual pigs based on machine vision.	color camera	FL3-U3-88S2C-C	?	Ceiling, top down	yes	Topview group-housed pigs video sequences -> Object extraction of drinking pigs -> Feature extraction -> Drinking pig recognition -> Drinking analysis -> Statistic of result	yes	yes	no	resource use	7	7	test pen	partially slatted, concrete	"Sunny day"	pig - general	?	?	against gold-standard	0.907	NA	NA	NA	NA	data	prototype	no
Nasirahmadi, A.	2016	Automatic detection of mounting behaviours among pigs using image analysis	black and white camera	Sony RF2938, EXview HAD CCD	Board lens 3.6 mm, 90 deg, Gyeonggi-do, South Korea	Ceiling, top down	yes	background subtraction, Otsu's method for greyscale to binary, smoothing, edge detection; For mounting- head, tail and sides of each pig elipse; then overlap and threshold distance, or overly-long elipsoids.	no	no	no	other behav	?	22-23	commercial	grey	lights on	fattener	Not listed	30kg	against gold-standard	92.7			94.5	88.6 specificity	algorithm	no	unclear
Lee, J.	2016	Automatic recognition of aggressive behavior in pigs using a kinect depth sensor	3-d	Kinect camera (Version 2, Microsoft, USA)	NA	Ceiling, top down	yes	Binary Classifier Support Vector Machine (SVM): depth info to identify pigs and stand/lie, frame to frame tracking of individuals, then activity index- min,max,mean,s.d. velocity, proximity of pigs. Identify 'normal', vs headknock or chase (aggression).	no	no	yes	aggression	22	22	indoor	slatted	NA	fattener	Not listed	25-30kg	against gold-standard	95.7					algorithm	no	unclear
Fraess, G.A.	2016	Automated behavioural response assessment to a feeding event in two heritage chicken breeds.	color camera	SAV-CD120; Schaumburg, IL, USA	NA	Ceiling, top down	no	EthoVision XT 10 (Noldus, Leesburg, VA, USA), activity measured as pixel change following method in Oh et al. 2015	no	no	no	activity	68	34	test pen	wood shavings	incandescent and turned on at 4 a.m. and turned off at 7 p.m. The light level at hen-height was 7 lx	chickens	Rhode Island Reds (RIR) and Barred Plymouth Rocks (BPR)	30 weeks	animal based measures	NA	NA	NA	NA	NA	data	no	no
Lao	2016	Automatic recognition of lactating sow behaviors through depth image processing	3-d	Microsoft Kinect	?	Ceiling, top down	yes	Raw depth data changed to real (physical) depth data, set high and low threshold values, remove feeder and crate pipes, apply moving average filter, change depth image to binary image, extract important features, divide the sow into 7 parts, calculate the average value of depth pixes per each part	no	no	yes	other behav	3	1	indoor	slatted	One heat lamp (175 W) was suspended above the creep area to the sow’s left side	sow	Landrace	?	against gold-standard	99.9% (lying), 96.4% (sitting), 99.2% (standing), 78.1% (kneeling), 97.4% (feeding), 92.7 (drinking), 63.9% (transitioning)	NA	NA	NA	NA	algorithm	prototype	no
Ma, C.	2016	Pig target extraction based on adaptive elliptic block and wavelet edge detection	color camera	?	?	Ceiling, top down	yes	The overlooking image of pigs -> two-dimensional OTSU threshold segmentation -> mathematical morphology processing -> adaptive elliptical block -> wavelet edge detection -> finally accurate target extraction results	no	no	no	segmentation of individuals	7	7	indoor	partially slatted, concrete	?	pig - general	?	?	none	NA	NA	NA	NA	NA	algorithm	prototype	no
Colles, F.M.	2016	Monitoring chicken flock behaviour provides early warning of infection by human pathogen campylobacter.	color camera	Logitech C120 web cameras	?	Ceiling, top down	yes	Optical flow analysis (mean, variance, skew, kurtosis)	no	no	no	activity	31 flocks	?	commercial	not mentioned	?	broilers	Ross 308, Cobb 500, or a mix of the two breeds	data collected until 30 days of age	animal based measures	NA	NA	NA	NA	NA	data	prototype	no
Peña Fernández, A.	2016	Analysis of behavioural patterns in broilers using camera-based technology	color camera	NA	NA	Ceiling, top down	yes	Activity and distribution measurements from the flock. Transfer function model to relate activity and distribution. The order of the model defines the type of behaviour	no	no	yes	movement, resource use and basic behaviours	5 flocks	27000 birds per flock	commercial	wood shavings	varied	broilers	Ross 308	1-5 weeks	animal based measures	50-80%	NA	NA	NA	NA	algorithm	prototype	no
Barnard, S.	2016	Quick, Accurate, Smart: 3D Computer Vision Technology Helps Assessing Confined Animals' Behaviour	3-d	Kinect depth camera for Windows (Microsoft)		Tri-pod	yes	Structural Support Vector Machine (SSVM)	yes	yes	yes	posture	5	1	indoor	grey	"controlled"	dog	1 bearded collie mix, 4 mixed breed shelter dogs	7 yr, and 4+ yr respectively	against gold-standard	74-83% (depending on trial)	trials were within 9% of each other			NA	software	prototype	no
Bell, N.J.	2016	Technology: are we any closer to automated lameness detection or automated mobility scoring?		NA	NA			review paper	yes	unclear		gait score						dairy cattle
Oczak, M.	2016	Automatic estimation of number of piglets in a pen during farrowing, using image analysis.	color camera	IP camera (GV-BX 1300-KV, Geovision, Taipei, Taiwan) in protective housing (HEB32K1, Videotec, Italy), 3 m above the floor, connected to Geovision		Ceiling, top down	yes	manual labelling; segmentation; Watershed algorithm; algorithm development	yes	yes	no	segmentation of individuals	8 sows	1 sow with litter	test pen	partially slatted, concrete	infrared spotlights (IR-LED294S-90, Microlight, Germany)	sow	Austrian Large White	not listed	against gold-standard	0.81 (81%)	SE of 1.72 piglets			NA	algorithm	yes	unclear
Mittek, M.	2016	Health Monitoring of Group-Housed Pigs using Depth-Enabled Multi-Object Tracking	color, infrared and 3D	Microsoft Kinect v2		Ceiling, angled view	yes	point cloud processed to elipsoid, Kalman filter for lie/stand, orientation.	yes	yes	yes	movement, posture, weight	15	15	test pen	slatted	Not relevant- 3D camera used own light source plus IR camera too	fattener	Not listed	not listed	against gold-standard					Tracking for 5 hrs 14 mins required 72 manual 'fixes' of mistakes by human	algorithm	prototype
Tullo, E.	2016	Technical note: Validation of a commercial system for the continuous and automated monitoring of dairy cow activity	color camera	Axis P5534 PTZ Dome Network	?	Ceiling, top down	no	Manual labelling to compare with CowView outcome and evaluate its accuracy. CowView is a RFID system which locates cow inside the barn and links this location with a behavioural activity	yes	yes	yes	movement, resource use and basic behaviours	5	5	commercial	NA	NA	dairy cattle	NA	NA	against gold-standard	0.95	NA	0.975	0.827	NA	software	yes	no
Wang, C.	2016	Evaluation of a laying-hen tracking algorithm based on a hybrid support vector machine	color camera	Launch, LC5505E7-C83R	?	Ceiling, top down	yes	Video, selection labelled manually, HSVM model, comparison with other algorithms	yes	yes	yes	segmentation of individuals	1	6	test pen	white	15–20 lux LED	hens	Hyline Brown	20-week-old	both gold standard an existing technology	NA	NA	NA	NA	NA	algorithm	prototype	open
Nasirahmadi, A.	2015	Automatic detection of changes in pig group lying behaviour using image analysis	black and white camera	Sony RF2938, EXview HAD CCD	NA	Ceiling, top down	yes	background subtraction, direct least squares ellipse fitting method, Delaunay triangulation for clustering	no	no	no	location	44	22	commercial	grey	?	fattener	Not listed	?	against gold-standard	95.1	NA			NA	algorithm	no	unclear
Gronskyte, R.	2015	Monitoring pig movement at the slaughterhouse using optical flow and modified angular histograms	color camera	GoPro HERO2	NA	Ceiling, top down	no	training: optical flow (OF) estimation and filtering, MAH based on OF for pigs in the frame identification, seelection of relevant angles in MAH and percentiles of these for normally behaving pigs. Testing: optical flow (OF) estimation and filtering, MAH based on OF for pigs in the frame identification, comparison selected bins against percentiles, interpolation and thresholding	no	no	yes	movement, posture	pigs	NA	slaughter house	NA	constant but not specify	fattener	crossbreeds between Duroc, Danish Landrace and Yorkshire(Dx(LxY))	7 months	animal based measures	NA	NA			NA	in progress	no	no
Gronskyte, R.	2015	Pig herd monitoring and undesirable tripping and stepping prevention	color camera	GoPro HERO2	NA	Ceiling, angled view	Yes	manual labelling; motion estimation (optical flow, pigs identification, optical flow filtering and distortion correction);feature extraction(image color map adjustment,color filtering, blob detectionimage dilation and holes filling); frame classification (SVM)	no	no	yes	movement, posture	30124 frames from 405-1035 pigs		slaughter house	NA	constant but not specify	fattener	crossbreeds between Duroc, Danish Landrace and Yorkshire(Dx(LxY))	6 months	against gold-standard	0.9247	0.9			0.94	algorithm	no	unclear
Porto, S.M.C.	2015	The automatic detection of dairy cow feeding and standing behaviours in free-stall barns by a computer vision-based system	color camera	10 x Vivotek FD7131	NA	Ceiling, top down	yes	Adding in standing at the feeder to previous lying in stall recognition. Based on Viola & Jones human facel recognition algorithm	no	no	no	resource use	15	15	commercial	wood shavings	artificial and natural light	dairy cattle	Holstein	?	against gold-standard	0.747			0.86		algorithm	no	unclear
Sa, J.	2015	Detection of Low-Weight Pigs by Using a Top-View Camera	color camera	?	?	Ceiling, top down	yes	Detect objects from RGB -> HSV colour information then binarisation, then Gaussian Mixture Model to detect moving pigs. Pixel number of detected moving pig used to identify a size threshold for low weight pigs.	no	no	no	weight estimation	22	22	commercial	slatted	?	weaner	?	?	none	NA	NA	NA	NA	NA	algorithm	no	unclear
Stavrakakis, S.	2015	Validity of the Microsoft Kinect sensor for assessment of normal walking patterns in pigs	3-d	Microsoft Kinect V1	NA	Top down	yes	Empy area to get floor distance, then distance of neck marker from camera generated neck movement during walking.	no	no	no	gait	7	1	test pen	concrete	NA	fattener	Hermitage	39 - 63 kg	against an existing technology	0.99					algorithm	prototype	unclear
Zhu	2015	The posture recognition of pigs based on Zernike moments and support vector machines	color camera	Microvision industrial digital camera	?	Side view	yes	First, the Otsu adaptive threshold segmentation is used to obtain the binary image. Then the contour of pigs is extracted by canny edge detection and morphological algorithms. Second, the Zernike moment feature parameters are extracted from the normalized binary contour images. Based on the above, the posture classifiers are designed according to support vector machine theory to recognize four ki…	no	no	no	posture	40	1	indoor	NA	natural light condition	pig - general	?	?	against gold-standard	95% (walk normally), 95% (walk with head down), 97.5% (walk with head up), 100% (lying)	NA	NA	NA	NA	algorithm	prototype	no
Wongsriworaphon, A.	2015	An approach based on digital image analysis to estimate the live weights of pigs in farm environments	color camera	Sony DSC-HX5	?	Ceiling, top down	yes	boundary detection, feature extraction, and pattern recognition, Cartesian coordinates	no	yes	no	weight estimation	458 images	1	commercial	concrete	?	pig - general	B91 (cross Large white, Landrace and Duroc)	22-27 wk old	animal based measures	91-96%	NA	NA	NA	NA	algorithm	prototype	unclear
Guo, Y.Z.	2015	Multi-object extraction from topview group-housed pig images based on adaptive partitioning and multilevel thresholding segmentation	color camera	Sony FL3-U3-88S2C-C	?	Ceiling, top down	yes	Single frame image of topview group housed pigs -> histogram equalization and maximun entropy threshold segmentation -> extract the valid data -> morphological processing -> determine each sub-block's cetroid -> adaptive partitioning -> secondary segmentation and subsequent processing -> obtain the accurage object extraction result	no	yes	no	location	30 randomly selected video segments	2019-05-08	test pen	partially slatted, concrete	gradual light changes	pig - general	"dark and light pigs"	NA	against gold-standard	0.925	NA	NA	NA	NA	algorithm	prototype	no
Nasirahmadi	2015	Using machine vision for investigation of changes in pig group lying patterns.	color camera	Sony RF2938, EXview HAD CCD	Board lens 3.6 mm, 90°	Top down	yes	Animals were extracted from their background using image processing algorithms, and the x–y coordinates of each binary image were used for ellipse fitting algorithms to localize each pig. By means of the region properties and perimeter of each Delaunay Triangulation, it was possible with high accuracy to automatically find the changes in lying posture and location within the pen of grouped pigs c…	no	no	no	posture and location	44	22	commercial	slatted	white fluorescent tube lights	fattener	? (white pigs in photos)	?	against gold-standard	0.958	NA	NA	NA	NA	algorithm	prototype	no
Zhu, Q.	2015	Automatic Animal Detection from Kinect Sensed Images for Livestock Monitoring and Assessment.	color camera	Microsoft Kinect	NA	Ceiling, top down	yes	Kinect point cloud data -> threshold the depth and perform depth image -> object detection and selection -> extraction of the data for further progress	no	no	no	standing	2	2	commercial	slatted	?	pig - general	? (white pigs in photos)	?	against gold-standard	Error percentages: 2.95% (small pigs), 2.06% (large pigs)	NA	NA	NA	NA	algorithm	prototype	no
Youssef, A.	2015	Towards real-time control of chicken activity in a ventilated chamber.	color camera	CCD camera	NA	Ceiling, top down	yes	background subtraction; use colour frame as input image; segmentation; calculating difference between binary images at time points	no	yes	yes	activity	45	9	test pen	not mentioned	halogen tubular lamp 100W	chicks	NA	7 days age	against treatment	NA	NA	NA	NA	NA	algorithm	yes	no
Yu, S.	2015	Tracking algorithm based on multi-feature detection and target association of pigs on large-scale pig farms	color camera	?	?	Ceiling, top down	yes	correct for light compensation, colour scale, combined feature model, edge feature, filtering, Kuhn-Munkres algorithm	yes	yes	no	segmentation of individuals	100 samples	4	indoor	concrete	?	pig - general	?	?	against an existing technology	92.3%%	NA	NA	NA	NA	algorithm	yes	unclear
Nilsson	2014	Learning based image segmentation of pigs in a pen	color camera	Axis M-3006 camera producing a 640× 480 color mjpeg video	NA	Ceiling, top down	yes	10 feature channels corresponding to LUV colour space, gradient channels etc are added to Otsu's method and a max-min filter. Structured prediction equations, Elastic net regularised logistic regression	no	no	no	segmentation of individuals	9	9	indoor	not mentioned	?	fattener	Not listed	Not listed	against gold-standard	0.97					algorithm	no	no
Ott, S.	2014	Automated video analysis of pig activity at pen level highly correlates to human observations of behavioural activities	black and white camera	Panasonic1/3″ CCD Digital Signal Processing B/W WV-BP330,		Ceiling, top down	yes	Segmentation by background subtraction, masking, adaptive histogram equalisation to eliminate light effects, binarised, morphological closing operator to remove small objects, activity index based on pixel changes.	no	no	yes	activity	40	10	indoor	slatted	70 lx 12 hour light period	fattener	Rattlerow Seghers, Piétrain Plus	27kg	against gold-standard	0.92					algorithm	prototype	unclear
Chung, Y.	2014	A cost-effective pigsty monitoring system based on a video sensor	color camera	?	?	Ceiling, top down	yes	Visual stream -> motion detection (Gaussian mixture model, background subtraction using background modeling) -> circadian rhythm computation -> info of circadian rhythm	no	no	no	activity	46	22, 24	commercial	green slats	continuous artificial	weaner	?	21-45 days	against treatment	99% (with high resolution and fps)	NA	NA	NA	NA	algorithm	prototype	no
Costa, A.	2014	Image-processing technique to measure pig activity in response to climatic variation in a pig barn	infrared	Sanyo VCB-3572IRP	NA	Ceiling, top down	yes	Eyenamic software, pixel analysis to detect activity changes and occupancy	no	no	no	activity and occupancy	33	16, 17	commercial	slatted	lights on 15 min before feeding, on for 40 min every feeding release time (3x daily)	fattener	?	150 days	none	NA	NA	NA	NA	NA	data	no	no
Kashiha, M.	2014	Performance of an image analysis processing system for hen tracking in an environmental preference chamber	color camera	Aventura, CAM5D24DNVP	2.4-mm fixed lens	Ceiling, top down	yes	Image processing system in matlab, 1. eliminate background, 2. segmentation of hen body, 3. Ellipse fitting	no	no	no	activity and occupancy	4	1	test pen	wire	?	hens	?	?	against gold-standard	95.9 ± 2.6%	NA	NA	NA	NA	algorithm	no	no
Kulikov, V.A.	2014	Application of 3-D imaging sensor for tracking minipigs in the open field test	3-d	Microsoft Kinect	?	Ceiling, top down	yes	The EthoStudio analyzed 3-D image stream frame-by-frame using the distance algorithm (1) for animal detection.After the whole sequence processing, the post processing rou-tine driven by a customable script engine calculates the mostimportant physiological parameters such as time in the center orcentral preference (4), horizontal (5) and vertical (6) activities.	no	no	no	activity and occupancy	108	1	test pen	wood shavings	brightly illuminated with twohalogen lamps of 30 wt each attached to the opposite walls, 75 cmabove the floor.	pig - general	white, agouti, spotted, and black minipiglets	2-3 months	animal based measures	NA	NA	NA	NA	NA	data	yes	unclear
Van Hertem, T.	2014	On farm implementation of a fully automatic computer vision system for monitoring gait related measures in dairy cows	3-d	Microsoft Kinect	NA	Ceiling, top down	no	Identification of cow in the video, filtering of good quality images, cow's body segmentation, extraction of back spine contour line and calculation of back curvature	no	no	no	gait score	210-240	210-240	commercial	slatted	NA	dairy cattle	Holstein-Friesian	NA	against gold-standard	0.7	NA	NA	NA	NA	in progress	no	no
Van Hertem, T.	2014	Automatic lamenes detection based on consecutive 3D video recordings		Microsoft Kinect	NA	Ceiling, top down	no	Algorithm for image processing described in Viazzi et al. 2017. Classification algorithems: Independent cow observations, individual consecutive measurements, ordinal multinomial logistic regression, nominal multinomial logistic regresion and linear regression models	no	no	no	gait score	500	186	commercial	NA	NA	dairy cattle	Israely-Holstein	NA	against gold-standard	0.909	NA	0.933	0.549	NA	algorithm	no	no
Viazzi, S.	2014	Image feature extraction for classification of aggressive interactions among pigs	color camera	Guppy F-080C and Guppy GC1350 camera	03514 3.5 mm lens / Pentax 4.8 mm lens	Ceiling, top down	yes	Data labelling manually, algorithm Motion History Image (MHI), parameter extraction, linear discriminant analysis	no	yes	yes	aggression	24	12	test pen	slatted	?	weaner	German breed	5 wk age	against gold-standard	0.89	NA	0.893	0.887	NA	algorithm	yes	no
Guo, Y.	2014	Foreground detection of group-housed pigs based on the combination of mixture of Gaussians using prediction mechanism and threshold segmentation	color camera	Sony FL3-U3-88S2C-C	?	Top down	yes	Video acquisition -> manually set valid region -> foreground detection using PM-MoG -> fuse results <- maximum entrophy threshold segmentation <- image enhancement	no	yes	no	location	7	7	test pen	partially slatted, concrete	varied	pig - general	mixed	NA	against gold-standard	0.92	NA	NA	NA	NA	algorithm	prototype	no
Tsai, D.	2014	A motion and image analysis method for automatic detection of estrus and mating behavior in cattle	color camera	IP dome camera (Q24 from MOBOTIX)	?	Top down	yes	Subject and image acquisition, image processing (motion detection, motion region segmentation, determining moving object length, estrus detection rule)	no	yes	no	other behav	20	20	commercial	NA	?	dairy cattle	Holstein	?	against gold-standard	100% true positives, 0.33% false positives	NA	NA	NA	NA	algorithm	prototype	no
Oczak, M.	2014	Classification of aggressive behaviour in pigs by activity index and multilayer feed forward neural network.	color camera	overhead camera (Allied Vision Technologies_x0002_,model F080C)	4.8 mm lens, camera 2.3 m above pen	Ceiling, top down	yes	manual labelling (8h takes 90 person hours); Activity index; multilayer feed forward neural network	yes	no	yes	aggression	11	11	commercial	partially slatted, concrete	50 LUX: natural light (2 windows, each 1x1 m) and artificial light (six 100 W fluorecent tubes)	fattener	Topigs 20 (large White _x0001_ Landrace) _x0001_ Pietrain	23 kg (2-3 months?)	against gold-standard	0.995		0.855	0.894	0.894	algorithm	prototype	unclear
Nakarmi, A.D.	2014	Automated tracking and behavior quantification of laying hens using 3D computer vision and radio frequency identification technologies	RFID detectors under floor grid and 3D	Cambube3, PMDTec, Siegen, Germany (time of flight)	NA	Ceiling, top down	yes	diffusion equation, Schrodinger's equation, edge detection, separation, RFID to recover identity	yes	no	no	movement, location	15	5 or 10	test pen	not mentioned	Not relevant- 3D camera used own light source plus IR camera too	hens	White leghorns	32 week	against gold-standard	0.95	NA			NA	algorithm	no	unclear
Khoramshahi, E.	2014	Real-Time Recognition of Sows in Video: A Supervised Approach	color camera	Tracer TS 6030PSC IR	NA	Ceiling, top down	yes	Definition of a set of image-based features according to local neighborhoods, investigate their separability and finding the optimum configuration for a neural network classifier	yes	no	no	segmentation of individuals	7 sows	7	commercial	orange slatted	varied	sow	NA	NA	against gold-standard	0.846	NA	NA	NA	NA	in progress	no	no
Zhu, W.X.	2014	Individual identification method for group-housed pigs based on optimal feature extraction
Aydin, A.	2013	Automatic Identification of Activity and Spacial Use of Broiler Chickens with Different Gait Scores	color camera	Logitech Webcam Pro 9000	3.7 mm Carl Zeiss HD AF lens	Ceiling, top down	yes	color discrimination algorithm	no	no	no	activity	30	30	test pen	wood shavings	Not mentioned	broilers	Ross 308	32 days	against gold-standard	NA	NA			NA	data	no	no
Gronskyte, R.	2013	Monitoring motion of pigs in thermal vieos	Thermal camera (exclude)	NA	NA	Ceiling, top down	No	manual labelling; 2 steps; 1st step: optical flow and Blob detection; 2nd step: multiway PCA and Quality control charts	no	no	yes	activity	5 thermal videos of pigs walking an alley: 4744 frames	NA	slaughter house	NA	Not mentioned	pig - general	NA	NA	against gold-standard	66% scenes (groups of 25 frames); 78% frames	NA			NA	algorithm	No	No
Porto, S.M.C.	2013	A computer vision-based system for the automatic detection of lying behaviour in dairy cows in free-stall barns	color camera	4 x Vivotek FD7131	wide angle- 105.1 deg horizontal, 77.4 deg vertical	Ceiling, top down	yes	computer vision based system using an algorithm proposed by Viola and Jones 2001,2004. Requires training by an operator selecting positive and negative training images.	no	no	no	location	15	15	commercial	wood shavings	artificial and natural light	dairy cattle	Holstein	?	against gold-standard	correlation of 0.989			0.92		algorithm	no	unclear
Costa, A.	2013	The use of image analysis as a new approach to assess behaviour classification in a pig barn	infrared	VCB 3572IRP	NA	Ceiling, top down	yes	Eyenamic software to detect activity, manual decoding of behavior	no	no	no	activity and occupancy	33	16, 17	commercial	slatted	lights on 15 min before feeding, on for 40 min every feeding release time (3x daily)	fattener	?	150 days	none	NA	NA	NA	NA	NA	data	no	no
Kashiha, M.	2013	The automatic monitoring of pigs water use by cameras	black and white camera	WV-BP330 CCD	?	Ceiling, top down	yes	Segmentation of pigs from background, extract pig's body as a ellipse, analyse body countour, detect ears (consequently head), if head detected at water >2s, count as water use	no	no	no	other behav	40	10	indoor	slatted	Light was switched on at 7 am and continued until 7 pm	fattener	?	25.1 ± 4.4 kg	against gold-standard	0.92	NA	NA	NA	NA	algorithm	prototype	no
Kashiha, M.	2013	Automatic monitoring of pig activity using image analysis	black and white camera	Panasonic WV-BP330	?	Ceiling, top down	yes	Determine the feeder and pen floor area by user -> histogram equalization -> image binarisation -> localisation (ellipse fitting) -> identification -> calculate movement of ellipses (activity) -> thresholding activity -> count number of active pigs	no	no	no	activity	40	10	indoor	slatted	six 36 watt, 120 cm Sylvania Luxline Plus white fluorescent tube lamps were installed at a height of 200 cm	fattener	Rattlerow Seghers x Piétrain Plus	?	against gold-standard	0.898	NA	NA	NA	NA	algorithm	prototype	no
Kongsro, J.	2013	Development of a computer vision system to monitor pig locomotion.	color camera	Microsoft OEM Life Cam Cinema from Microsoft Corporation	?	Ceiling, top down	yes	Read image frame, resize and crop image, convert RGB to grayscale, adjust image intensity, threshold and convert to binary, find biggest object (pig), filter in moving pigs, morpological closing, align pig, move pig to center, remove head and ear, generate map image (all done in MATLAB)	no	no	no	gait	288	1	test pen	concrete	?	pig - general	Norwegian landrace boars	body weight ranging from 90 kg and 130 kg	none	NA	NA	NA	NA	NA	data	no	no
Pereira, D.	2013	Machine vision to identify broiler breeder behavior	color camera	?	?	Ceiling, top down	yes	identification body position; isolation of images of birds of interest; filter to seperate bird from background; Weka software for construction and validation of behaviour classification tree	no	no	yes	other behav	10	1	test pen	wood shavings	?	broilers	Hybro-PG	?	cross validation and set training	0.703	NA	NA	NA	NA	method	yes	no
Kashiha, M.	2013	Automatic identification of marked pigs in a pen using image pattern recognition	black and white camera	Panasonic WV-BP330	?	Ceiling, top down	yes	Binarise the image -> localise the pigs (fit an ellipse) -> extract the paint pattern on the pigs -> attain the countour of the paint patterns ->calculate fourier description (FD) of paint pattern contours -> calculate the Euclidean distance of the FDs - > match the extracted patterns with standard patterns -> report the detected ID	yes	no	no	individual identification	40	10	indoor	slatted	12 h light period from 07:00–19:00 h. minimum of 11.7 lux and a maximum of 176.1 lux	fattener	Rattlerow Seghers x Piétrain Plus	27 ± 4.4 kg	against gold-standard	0.887	NA	NA	NA	NA	algorithm	prototype	no
Van Hertem, T.	2013	Comparison of segmentation algorithms for cow contour extraction from natural barn background in side view images	color camera	AVT IEEE1394 Guppy F080C	NA	Side view	yes	Finding cow in the frame, segment cow from the background and back contour line extraction from segmentation mask	yes	yes	no	gait score	70	70	commercial	concrete	NA	dairy cattle	Israeli Holstein	NA	against gold-standard	NA	NA	NA	NA	NA	algorithm	yes	no
Viazzi, S.	2013	Analysis of individual classification of lameness using automatic measurement of back posture in dairy cattle	color camera	Canon 60D, Nikon D700	Canon 17-85 IS USM, Nikon 28/105 AF Nikkor	Side view	yes	The Body Movement Pattern (BMP) is calculated every 5 frames and a decision tree learning classifier was applied to relate the BMP with one of the 3 lameness classes. Thresholds were set at population and individual level	yes	yes	no	gait score	90	90	commercial	concrete	NA	dairy cattle	Holstein-Friesian	NA	against gold-standard	0.76	NA	83-91%	NA	NA	algorithm	prototype	no
Tu, G.	2013	Segmentation of Sows in Farrowing Pens	black and white camera	Monacor TVCCD-140IR	NA	Ceiling, top down	yes	Gaussian mixture model for background subtraction; dyadic wavelength transform	yes	yes	yes	segmentation of individuals	24	1	commercial	straw	fluorescent lamps as in commercial farrowing shed	sow	NA	NA	against gold-standard	0.97	NA	NA	NA	NA	algorithm	yes	no
Dawkins, M. S.	2012	Optical flow, flock behaviour and chicken welfare	color camera	Logitech C120 web cameras		Ceiling, angled view	yes	Optical flow analysis (mean, variance, skew, kurtosis)	no	no	no	gait and other health measures	24 flocks	33000-35000 per house	commercial	not mentioned	"in accordance with practice recommended by the breeder companies"	broilers	"one of two commercial strains"	1 to 35 days (data collected through entire lives)	both gold standard and animal-based measures	NA	NA	NA	NA	NA	data	prototype	no
Pluk, A.	2012	Automatic measurement of touch and release angles of the fetlock joint for lameness detection in dairy cattle using vision techniques	color camera	Guppy F-080C	SV-03514 3.5-mm	Side view	yes	Synchronize camera and mat data. Find touch and release of hoof, find matching camera image and calculation of touch and release angle	yes	no	no	gait score	75	75	commercial	concrete, black slats, blue mat	varied	dairy cattle	Holstein	NA	against gold-standard	NA	NA	NA	NA	NA	algorithm	prototype	no
Kristensen, H.	2011	Automatic detection of deviations in activity levels in groups of broiler chickens – A pilot study	color camera	?	?	Top down	yes	The first step applied a model, which was able to filter out outliers in the data stream of automatically recorded activity from overhead video cameras. The second step described the undisturbed levels of activity in groups of broiler chickens over the course of a day in week 1, 2 and 3. The third step applied a method to detect deviations in activity level, thereby giving an indication of a leve…	no	no	no	activity	36	6	indoor	wood shavings	40 lux and a photoperiod regime of 16L:8D without dawn and dusk	broilers	ROSS308	1,2, and 3 weeks	none	NA	NA	NA	NA	NA	algorithm	yes	no
Ahrendt, P.	2011	Development of a real-time computer vision system for tracking loose-housed pigs	color camera	Elphel NC353L	fisheye lens with correction algorithm	Ceiling, top down	yes	2 step. Step 1: build support maps, pointing to preliminary pig segments in each video frame. Step 2: build up a 5D-Gaussian model of the individual pigs (i.e. position and shape).	yes	yes	no	individual identification	3	3	indoor	partially slatted, straw bedded	two 30W fluorescent tubes	fattener	Not listed	10 wks	against gold-standard	1	NA			Could track for 8 mins	in progress	prototype	no
Aydin, A.	2010	Application of a fully automatic analysis tool to assess the activity of broiler chickens with different gait scores	color camera	Guppy F036C	C30811KP 8.5mm lens (Pentax)	Ceiling, top down	no	Eyenamic software	no	no	no	activity	60	5	test pen	wood shavings	"lights kept on"	broilers	Ross 308	32 days	animal based measures	NA	NA			NA	data	no	no
Weixing, Z.	2010	Identification of abnormal gait of pigs based on video analysis	color camera	?	?	Side view	yes	i) Detection and extraction of the moving pig body and its contour from image sequences; ii) Modeling of pig's forelimb and Extraction of gait information by the joint angles and body points; and iii) Motion analysis and feature extraction for classifying abnormal gait	no	yes	yes	gait score	58	1	commercial	concrete	?	pig - general	?	?	against gold-standard	0.9	NA	NA	NA	NA	algorithm	yes	unclear
Weixing, Z.	2010	Detection of porcine respiration based on machine vision	color camera	?	?	Ceiling, top down	yes	pretreatment of image, concave-convex recognition method	no	yes	yes	Respiration	10	1	indoor	concrete	?	pig - general	?	?	against gold-standard	0.94	NA	NA	NA	NA	algorithm	prototype	unclear
Poursaber, A.	2010	Real-time automatic lameness detection based on back posture extraction in dairy cattle: shape analysis of cow with image processing techniques	color camera	Canon Powershot A620, Guppy F-080C	NA, SV-03514 3.5-mm	Side view	yes	Course estimation of the cow, fine segmentation and binarization and back posture extarction/reconstruction to define the curvature	yes	no	no	gait score	94	94	commercial	concrete, black slats, blue mat	varied	dairy cattle	Holstein	NA	against gold-standard	0.96	NA	NA	NA	NA	algorithm	prototype	no
Zhu, W.	2009	Automated detection of sick pigs based on machine vision.	black and white camera	?	?	Side view	yes	Moving object detection (improved with background reduction) -> number recognition algorithm based on symmetrical pixel block -> image pretreatment (binary image) -> number location -> feature extraction and recognition for the numbers	no	no	no	Defecation	10	10	indoor	not mentioned	?	pig - general	Yorkshire	?	animal based measures	0.7838	NA	NA	NA	NA	algorithm	prototype	no
Dawkins, M.	2009	Optical flow patterns in broiler chicken flocks as automated measures of behaviour and gait	color camera	Logitech 500	?	Ceiling, angled view	yes	Optical flow analysis (mean, variance, skew, kurtosis)	no	no	no	gait	10 flocks	Between 3700 and 40,000 birds	commercial	not mentioned	?	broilers	"one of two commercial strains"	between 32 and 35 days	against gold-standard	NA	NA	NA	NA	NA	data	prototype	no
Navarro-Jover	2009	An automatic colour-based computer vision algorithm for tracking the position of piglets	color camera	CCD colour video camera	Zoom lens, FD 6mm, Aperture 1.4	Ceiling, top down	yes	RHB matrices, segmentation thresholds, mask, erosion, calculate position (see flow chart in paper for more detail)	yes	no	no	location	9	9	indoor	not mentioned	two fluorescent tubes of 36 W, 120 cm long, with a luminous flux of 2,100 lm	piglets	Not listed	pre-wean (with sow)	against gold-standard	0.646	NA			NA	algorithm	yes	no
Fujii	2009	Poultry tracking system with camera using particle filters	black and white camera	?	fish-eye	Ceiling, top down	yes	Use of a poultry tracker (one per bird) plus an exploring tracker to determine when tracker loses bird (one per test pen). Create images ->prediction of transferences -> calculations of likelihoods -> estimation of state vector -> drawing estimation ellipse on image -> sampling particles -> Judgement and correction	yes	yes	no	movement, location	10	10	test pen	wire	?	broilers	not specified (white birds in images)	NA	against gold-standard	NA	NA	NA	NA	avg tracking duration= 50 s.	algorithm	prototype	no
Cangar, O.	2008	Automatic real-time monitoring of locomotion and posture behaviour of pregnannt cows prior to calving using online image analysis	color camera	Mitsubishi, BDC4803VFD	4–8mm varifocal lens	top down and side view	yes	Input: centre point and orientation -> image acquisition -> fit theoretical cow -> determine theoretical edges based on contrast with background -> determine centre point and orientation -> output: body variables -> classified behavior	no	no	yes	movement, posture	8	1	test pen	straw	?	dairy cattle	Limousin x Fresian (x5), Limousin (x1), Charolais (x2)	2-6 years	against gold-standard	85% (standing/lying), 87% (eating/drinking)	NA			NA	algorithm	prototype	no
Shao, B.	2008	A real-time computer vision assessment and control of thermal comfort for group-housed pigs	black and white camera	?	?	Ceiling, top down	yes	Motion detection- looks for shading coefficient for small blocks of successive images. No variation implies no motion, so pigs lying. Image segmentation based on grey-level, convert to binary. Feature extraction to detect groups of pigs and then calculate compactness of lying group.	no	no	no	location	7	7	indoor	green slats	?	fattener	?	?	using paper cut out pig silhouettes	over 90%'	NA	NA	NA	NA	algorithm	prototype	unclear
Souza, S.R.L.	2008	Computational vision use for evaluation of confined dairy cows behaviour	color camera	?	?	Ceiling, angled view	yes	Unclear. Line across a 640 x 480 pixel image was analysed for colour, to look for white (cows were black and white). Glare of sunlight reflecting from surfaces also looks white, so false detections a problem. Centre of mass algorithm for body centre, and agglomeration algorithms too.	no	no	no	location	80	80	commercial	concrete	artificial and natural light	dairy cattle	Holstein	600kg	against gold-standard	?					algorithm	prototype	no
Cronin, G.	2008	Using video image analysis to count hens in cages and reduce egg breakage on collection belts	Black and white camera and color camera	QC3494 and QC3468, respectively, Jaycar	NA	Side view	yes	VIA software previously developed by Dunn (2007), targets defined, software counts numbers of targets present	no	no	no	Counts of animals	~57800	~200 (test lab), ~57600 (commercial)	commercial	NA	artificial plus IR lights built into camera	hens	Hy-Line Brown	?	against gold-standard	0.79	NA	NA	NA	NA	software	prototype	no
Song, X	2008	Automatic detection of lameness in dairy cattle—vision-based trackway analysis in cow’s locomotion	color camera	AVT Marlin F-131C	COSMICAR TV Zoom 12.5-75mm 1:1.8	Side view	yes	the video is splitted in frames; background substracting; extraction of cow's body; center points of hoof area and hoof bottom contacting the floor; definition of different orientations based on different distances between images; definition of the tracking overlap as the distance of the hind hoof on the fore hoof position being the substractionbetween the position of the fore hoof and the hind h…	yes	no	no	gait score	15	15	outdoor	not mentioned	NA	dairy cattle	NA	multiparous	against gold-standard	NA	NA	NA	NA	NA	algorithm	yes	no
Moura, D.J.	2006	Development of a software to estimate piglets welfare using the computational vision	color camera	micro camera Top Cam®	120 degree	Ceiling, top down	yes	pixel colour, centre of mass, x - y co-ordinate of each pig, dispersion metric calculated	no	no	no	movement	?	litter of piglets	indoor	concrete, black slats, blue mat	?	piglets	Not listed	pre-wean (with sow)	none	NA	NA			NA	algorithm	no	no
Leroy, T.	2006	A computer vision method for on-line behavioral quantification of individually caged poultry.	black and white camera	Sanyo VCB-3572IRP	?	Ceiling, top down	yes	In step 1, relevant posture parameters (_x0001_, r1, r2) describing the shape of the hen in the image are determined for each of the incoming camera images by fitting a deformable ellipse model. In step 2, a first-order dynamic model is fit through the time series of the posture parameters within a fixed time window. In step 3, the time pattern described by the dynamic model parameters (a, b) is …	no	no	yes	other behav	18	1	test pen	wire	?	hens	brown Hisex laying hens	between 32 and 42 weeks old	against gold-standard	NA	NA	NA	NA	NA	algorithm	prototype	no
Leroy, T.	2005	Computer vision based recognition of behavior phenotypes of laying hens.	black and white camera	Sanyo VCB-35721RP	?	Ceiling, top down	yes	In step 1, relevant posture parameters are extracted from an incoming camera image by fitting a trained point distribution model. After this, step 2 combines the parameter values from subsequent images into a single dynamic representation of the time window. In the final step 3, this dynamic representation is compared to a set of trained prototypes corresponding to the pre-defined behavior classe…	no	no	yes	other behav	5	1	test pen	wire	14 lux in the main compartment and 1 lux in the laying nests	hens	brown Hisex laying hens	between 32 and 42 weeks old	against gold-standard	90.7% (standing), 73.5% (sitting), 96.1% (sleeping), 69.7% (grooming), 89.3% (scratching), 21.2% (pecking)	NA	NA	NA	NA	algorithm	prototype	no
Lind, N.M.	2005	Validation of a digital video tracking system for recording pig locomotor behaviour.	black and white camera	TOPICA TP-606D/3, Videosystemer A/S, Hedehusene, Denmark	8mm wide-angle CCTV lens (with auto iris)	Ceiling, top down	yes	Image subtraction (refernece frame does not contain animal), threshold technique (can account for background same color as animal)	no	no	no	movement	7	1	test pen	grey	?	pig - general	femaleG¨ottingen minipigs	18 months	against treatment	NA	0.6% (coefficient of repeatability)	NA	NA	NA	algorithm	yes	open
Lind, N.M.	2005	Validation of a digital video tracking system for recording pig locomotor behaviour.	black and white camera	TOPICA TP-606D/3 (monochrome)	8mm wide-angle CCTV lens with auto iris	Ceiling, top down	yes	reference frame, then automatic threshold detection algorithm	yes	yes	no	movement	7	1	test pen	concrete	?	pig - general	Gottingen minipigs	18 months (15-25kg)	against object model	?	NA	NA	NA	0.6	algorithm	yes	no
Xin, H.	2002	Real-time assessment of swine thermal comfort by computer vision	black and white camera	CCD camera	?	Ceiling, top down	yes	image segmentation, feature selection, image classification and temperature set point	no	yes	yes	location	?	?	commercial	slatted	?	pig - general	?	around 6wk	using paper cut out pig silhouettes	0.95	NA	NA	NA	NA	algorithm	prototype	unclear
Zelek, J.S.	2001	Real-time automated concurrent visual tracking of many animals and subsequent behavioural compilation	black and white camera	NA	NA	unknown	yes	manual clicking	no	yes	no	movement	1	1	indoor	NA	NA	pig - general	NA	NA	against gold-standard	NA	NA	NA	NA	NA	in progress	no	no
Noldus, L.P.	2001	EthoVision: A versatile video tracking system for automation of behavioral experiments	color camera	NA	NA	Ceiling, top down	yes	Segmentation against background using gray scaling, subtraction, or colour tracking	yes	no	no	movement, location	n/a	up to 16 claimed	test pen	NA	?	any	NA	NA	none						software	yes	no
Perner, P.	2001	Motion Tracking of Animals ofr Behavior Analysis	color camera	?	?	Ceiling, angled view	yes	empty pen as reference image subtracted from later ones with pigs. segmentation, object identification and centre of gravity, then tracking.	yes	yes	no	location	3	3	test pen	black	?	fattener	?	?	none	NA					algorithm	no	no
Sustr, P	2001	Computer-aided method for calculating animal confugurations during social interactions from two-dimensional coordinates of color-marked body parts	color camera	?	?	Top down	yes	Uses Ethovision, 2 pigs have 2 different colour marks (head and back). X-Y coordinate data then processed to reduce errors, then interpolate missing error data, then relative orientation calculated.	yes	no	yes	aggression	96	4	test pen	straw	?	weaner	?	32 days	against gold-standard	~70%					software	yes	unclear
Xin, H.	1999	Assessing swine thermal comfort by image analysis of postural behaviours.	black and white camera	Canon T-70 with command back	?	Ceiling, top down	no	Neural network analyis of postural images; image feature selection	no	no	yes	posture	10	10	test pen	wire	27 lux	piglets	NA	2 weeks but weaned	against treatment	NA	NA	NA	NA	NA	in progress	prototype	no
Morrow-Tesch	1998	A video data base system for studying animal behavior	color camera	NA	?	unknown	yes	active contours "snakes". Vague- more detail in Jiang, H., and J. Dailey. 1996. Video database system for studying animal behavior. In: Proc. SPIE Multimedia Storage An Archiving Systems 2916:162-173.	yes	yes	no	movement	1	1	test pen	not mentioned	?		?	?		NA	NA			Tracks one pig for 200 frames	algorithm	no	no
Shao, J.	1998	Comparison of image feature extraction for classification of swine thermal comfort behavior	color camera	NA	NA	Ceiling, top down	yes	Binarization of the images, extraction of features using Fourier coefficients and moments, perimeter and area. Neural network to classify the pig distribution according to thermal conditions	yes	no	no	resource use	40	40	test pen	NA	NA	piglets	NA	13-16 days	animal based measures	0.75	NA	NA	NA	NA	algorithm	no	no
Bloemen, H.	1997	Image analysis to measure activity index of animals	black and white camera	CCD Cameras, Hitachi Denshi Ltd, Japan	I6 mm Lens Cosmican	Ceiling, top down	yes	localise animal in image (2 options, 1: compare empty pen with full pen, 2: subtract animal from background). Locate animals by comparing to empty test chamber. Calculate activity index by number of moving pixels. Occupation by number of pixels.	no	no	no	movement, location	15 (chickens), 9 (piglets) (two separate tests)	15 (chickens), 9 (piglets) (two separate tests)	commercial	not mentioned	500 Watts (pigs), not mentioned (chickens)	Chickens and pigs	Not listed	2-6 d (chickens), 20 kg (pigs)	against gold-standard	3mm (chickens), 10mm (pigs) accuracy of detection	NA			NA	algorithm	yes	no
McFarlane, N.J.B.	1995	Segmentation and tracking of piglets in images.	black and white camera	?	?	Ceiling, top down	yes	Median background and Laplacian operator; tracking with blob edges in elliptical window	yes	yes	no	segmentation of individuals	10	10	test pen	straw	Diffuse overhead lighting	piglets	NA	4 weeks	none	NA	NA	NA	NA	NA	algorithm	prototype	no
